## **Corticosteroids and cellulose purification improve respectively the in vivo translation and vaccination efficacy of self-amplifying mRNAs**

Zifu Zhong<sup>1,#</sup>, Séan Mc Cafferty<sup>1,2,#</sup>, Lisa Opsomer<sup>1</sup>, Haixiu Wang<sup>3</sup>, Hanne Huysmans<sup>1</sup>, Joyca De Temmerman<sup>1,4</sup>, Stefan Lienenklaus<sup>5</sup>, João Paulo Portela Catani<sup>1</sup>, Francis Combes<sup>1,2</sup>, Niek N. Sanders<sup>1,2,\*</sup>

<sup>1</sup> Laboratory of Gene Therapy, Department of Nutrition, Genetics and Ethology, Faculty of Veterinary Medicine, Ghent University, Heidestraat 19, 9820 Merelbeke, Belgium

<sup>2</sup> Cancer Research Institute (CRIG), Ghent University, 9000 Ghent, Belgium

<sup>3</sup> Laboratory of Immunology, Department of Virology, Parasitology and Immunology, Faculty of Veterinary Medicine, Ghent University, Salisburyaan 133, 9820 Merelbeke, Belgium

<sup>4</sup> Department of Pathology, Bacteriology and Poultry diseases, Faculty of Veterinary Medicine, Ghent University, Salisburyaan 133, 9820, Merelbeke, Belgium

<sup>5</sup> Institute for Laboratory Animal Science, Hannover Medical School, Carl-Neuberg-Str. 1, 30625 Hannover, Hannover, Germany

**# These authors contributed equally to this work**

**\*Correspondence should be addressed to Prof. Niek N. Sanders, Niek.Sanders@ugent.be, Tel: 0032 (0)9 264 78 08.**

1 **Abstract**

2 Synthetic mRNAs are an appealing therapeutic platform with multiple biomedical  
3 applications ranging from protein replacement therapy to vaccination. In comparison to  
4 conventional mRNA, synthetic self-amplifying mRNAs (sa-mRNAs) are gaining  
5 increased interest due to their higher and longer-lasting expression. However, sa-  
6 mRNAs also elicit an innate immune response, which may complicate the clinical  
7 translation of this platform. Approaches to reduce the innate immunity of sa-mRNAs  
8 have not been studied in detail. In this work we investigated the effect of several innate  
9 immune inhibitors and a novel cellulose-based mRNA purification approach on the type  
10 I interferon (IFN) response, translation and vaccination efficacy of our formerly  
11 developed sa-mRNA vaccine against Zika virus. Among the investigated inhibitors, we  
12 found that topical application of clobetasol at the sa-mRNA injection site was the most  
13 efficient in suppressing the type I IFN response and increasing the translation of sa-  
14 mRNA. However, clobetasol prevented the formation of antibodies against sa-mRNA  
15 encoded antigens and should therefore be avoided in a vaccination context. Residual  
16 dsRNA by-products of the *in vitro* transcription reaction are known inducers of  
17 immediate type I IFN responses. We additionally demonstrate drastic reduction of these  
18 dsRNA by-products upon cellulose-based purification, consequently reducing the  
19 innate immune response and improving sa-mRNA vaccination efficacy.

20 **Key words:** innate immunity inhibitors, self-amplifying mRNA, type I IFN, mRNA  
21 purification, cellulose, clobetasol, Zika vaccine

## 22 **Introduction**

23 Synthetic mRNAs have become an appealing therapeutic platform with multiple  
24 biomedical applications ranging from protein replacement therapy to vaccination [1, 2].  
25 Compared to plasmid DNA and viral vectors synthetic mRNAs hold some important  
26 advantages. First, they do not have to cross the nuclear barrier to exert their function,  
27 making them effective in both dividing and non-dividing cells [1, 3]. Furthermore,  
28 synthetic mRNAs allow cell-free production and exert a transient and more predictable  
29 expression [1, 2]. In recent years, synthetic self-amplifying mRNAs (sa-mRNAs) have  
30 also been gaining interest because of their higher and longer-lasting expression  
31 compared to non-amplifying mRNAs [4, 5]. Self-amplifying RNAs encode an RNA-  
32 dependent RNA polymerase (replicase) that gives them the capacity to trigger a  
33 temporal amplification of their backbone. Additionally, this replicase also generates  
34 many copies of smaller “subgenomic RNA(s)” that encode the protein(s) of interest. By  
35 using synthetic sa-RNAs it is hence possible to reduce the dose and the need for  
36 repeated injections, while still benefiting from the desirable features of synthetic  
37 mRNAs.

38 However, innate immunity triggered by sa-mRNA may complicate the clinical  
39 translation of this platform. The current *in vitro* production process of synthetic (sa)-  
40 mRNAs generates by-products such as short abortive transcripts and double stranded  
41 (ds) RNA species, which are recognized as non-self by toll-like receptors (TLRs),  
42 cytoplasmic RIG-I like receptors (RLRs) and other cellular pattern recognition

43 receptors (PRRs) [1, 6, 7]. This triggers the production of proinflammatory cytokines  
44 and type I interferons (IFN), which are undesirable when synthetic (sa)-mRNAs are  
45 considered for protein (replacement) therapy [7]. In contrast, the cytokines induced by  
46 this self-defence mechanism may serve as adjuvants and hence facilitate the effects of  
47 synthetic (sa)-mRNA vaccines [8]. However, this view needs to be nuanced as studies  
48 demonstrated that, depending on the administration approach, type I IFN responses can  
49 also decrease the efficacy of mRNA vaccines by negatively affecting immune responses  
50 [9] and by inducing enzymes that inhibit mRNA translation [10, 11]. An important  
51 breakthrough was achieved when Kariko et al. demonstrated that the innate immunity  
52 of synthetic mRNAs can be drastically reduced by incorporation of modified  
53 nucleotides and by reversed-phase high-performance liquid chromatographic (HPLC)  
54 purification [12-14]. However, this was only demonstrated for non-amplifying mRNAs.  
55 We recently demonstrated that the innate immune response triggered by the self-  
56 amplifying mRNA platform [4, 5, 11] reduced the cellular and humoral responses of an  
57 sa-mRNA vaccine against Zika virus [15]. Therefore, strategies that can reduce the  
58 innate immunity of sa-mRNAs may improve the efficacy of sa-mRNA vaccines and the  
59 acceptance of sa-mRNA therapeutics in general. Tempering the innate immunity of sa-  
60 mRNA by inclusion of modified nucleosides is expected to have a negative impact on  
61 the replication of the sa-RNA [4, 16]. Moreover, the large size (> 10 kb) of sa-RNAs  
62 makes them more prone to shearforces, which complicates their purification by  
63 reversed-phase HPLC. Therefore, alternative strategies to decrease the innate immunity  
64 of sa-RNAs are needed.

65 In this work we investigated the capacity of several innate immune inhibitors to temper  
66 the innate immune response and improve the expression of a self-amplifying mRNA  
67 vaccine against Zika virus (ZIKVac-sa-mRNA). The tested inhibitors (Fig. 1) were  
68 either mixed with the sa-mRNA vaccine or locally administered at the intradermal  
69 injection site. Local application of clobetasol caused the strongest reduction of the  
70 innate immunity and drastically improved the *in vivo* translation of the sa-mRNA. In an  
71 alternative approach to mitigate innate immune responses triggered by dsRNA by-  
72 products, we also purified the ZIKVac-sa-mRNA by a new cellulose-based procedure.  
73 This new purification process drastically reduced the innate immunity, improved the  
74 expression and vaccination efficacy of our ZIKVac-sa-mRNA vaccine.

75

76 **Results**

77 *Tempering the innate immunogenicity of self-amplifying mRNA with innate immune*  
78 *inhibitors*

79 It is known that the *in vivo* safety and efficacy of sa-mRNA therapeutics is compromised  
80 by their strong activation of type I interferons (IFNs). To address this issue, we  
81 evaluated the capacity of a series of innate immune inhibitors (Fig. 1) to suppress the  
82 *in vivo* type I IFN response elicited by an sa-mRNA vaccine against Zika virus  
83 (ZIKVac-sa-mRNA). To this end, we co-administered innate immune inhibitors with  
84 the ZIKVac-sa-mRNA in the skin of IFN- $\beta$  luciferase reporter mice (IFN- $\beta^{+/\Delta\beta-luc}$  mice)  
85 [17]. In these transgenic mice the luciferase expression is under control of the promoter  
86 of IFN- $\beta$ , a key type I IFN. In the absence of co-administered innate immune inhibitors  
87 the IFN- $\beta$  expression rapidly increased and peaked within 0-5 h after intradermal  
88 electroporation of the ZIKVac-sa-mRNA vaccine. After this peak the IFN- $\beta$  expression  
89 sharply dropped and the background IFN- $\beta$  expression was reached after about one  
90 week (Fig. 2a). Furthermore, we confirmed that the elicited IFN- $\beta$  response is mainly  
91 occurring from the ZIKVac-sa-mRNA vaccine, as electroporation of solely PBS  
92 induced only a moderate type I IFN response (Fig. 2a, black curve). Co-injection of the  
93 water-soluble oligonucleotide-based TLR inhibitors ODN2088 or ODN20958 (Fig. 1a)  
94 with the ZIKVac-sa-mRNA vaccine significantly reduced the immediate type I IFN  
95 response (Fig. 2b-c). However, this innate immune tempering effect was lost after one  
96 day. The inhibitory effect of ODN2088, which blocks TLR7/8/9, was slightly higher

97 than that of ODN20958, which only blocks TLR7 (Fig. 2b-c). A lower, but still  
98 significant, reduction of the early IFN- $\beta$  response was also achieved when the ZIKVac-  
99 sa-mRNA was co-injected with lower doses ( $< 20 \mu\text{g}$ ) of these TLR inhibitors (Fig. S1  
100 a-b).

101 Next, we evaluated the TLR-3/dsRNA complex inhibitor and BAY11 (Fig. 1b-d). The  
102 latter inhibits the intracellular NOD-like receptor pyrin 3 (NLRP3) and nuclear factor  
103 kappa-light-chain-enhancer of activated B cells (NF- $\kappa\text{B}$ ). DMSO was used to dissolve  
104 these inhibitors as both are water insoluble. We first confirmed that addition of small  
105 amount of DMSO (1  $\mu\text{l}$ ) to our ZIKV-sa-mRNA vaccine (50  $\mu\text{l}$ ) did not change its IFN-  
106  $\beta$  induction capacity (Fig. 2d). Co-injection of ZIKV-sa-mRNA with 25  $\mu\text{g}$  BAY11  
107 significantly suppressed the IFN- $\beta$  response during the first 24 h (Fig. 2e), while 12.5  
108  $\mu\text{g}$  of BAY11 was not effective (Fig. S1 c). In contrast, neither of the tested TLR-3  
109 inhibitor doses tempered the intrinsic innate immunogenicity of the ZIKVac-sa-mRNA  
110 vaccine (Fig. S1 d-e).

111 In a subsequent experiment we studied whether pretreatment and posttreatment of the  
112 injection spot with BAY11 or ODN2088 could increase and prolong their capacity to  
113 temper the innate immunogenicity of our sa-mRNA vaccine. Surprisingly, pretreatment  
114 of the injection site with BAY11 or ODN2088 and twice daily intradermal  
115 administration of these inhibitors after the injection of the ZIKVac-sa-mRNA did  
116 slightly, but not drastically increase or prolong the suppression of the IFN- $\beta$  response  
117 (Fig. 2f-g). In another attempt to quell the type I IFN response, we considered topical

118 application of the corticosteroid clobetasol. To that end, the injection site was pretreated  
119 with a clobetasol ointment 12 h prior to administration of ZIKVac-sa-mRNA.  
120 Clobetasol treatment was subsequently repeated twice daily during three days starting  
121 at the day of ZIKVac-sa-mRNA injection. This schedule of local clobetasol treatment  
122 drastically reduced and shortened the elicited type I IFN response (Fig. 2h). A  
123 significant inhibitory effect was observed up to two days after ZIKVac-sa-mRNA  
124 injection and overall a 3-fold reduction of the IFN- $\beta$  expression was observed (Fig. 2i).

#### 125 *Co-administration of multiple innate immune inhibitors*

126 We next evaluated whether co-administration of multiple innate immune inhibitors  
127 could further decrease the type I IFN response elicited by our ZIKVac-sa-mRNA  
128 vaccine. In more detail, clobetasol was co-administered with either ODN2088 or  
129 BAY11, or with both inhibitors. In these experiments clobetasol was applied locally at  
130 the injection site twice daily for three days starting from the day of ZIKVac-sa-mRNA  
131 injection. The ODN2088 or BAY11 inhibitors were given as a single co-injection with  
132 the ZIKV-sa-mRNA (Fig. 3a). The clobetasol pretreatment, which was skipped in this  
133 experiment, seems to be of great importance as the inhibition of the IFN- $\beta$  response was  
134 much lower without pretreatment of clobetasol (Fig. 2h and Fig. S1 f versus Fig. 3b and  
135 Fig. 3f). A drastic reduction of the type I IFN response was observed when clobetasol  
136 was combined with BAY11 or/and ODN2088 (Fig. 3c-e and Fig. 3g-i). Especially, the  
137 combination of the three inhibitors (clobetasol+ODN2088+BAY11) was very



138 successful in inhibiting the type I IFN response elicited by our sa-mRNA vaccine (Fig.  
139 3e and 3i).

#### 140 *Influence of innate immune inhibitors on the translation of self-amplifying mRNA*

141 It is generally accepted that a strong innate immune response after mRNA delivery has  
142 a negative impact on its translation efficacy [9-11, 15]. Therefore, we evaluated in  
143 BALB/c mice the effect of clobetasol, BAY11 and ODN2088 on the translation efficacy  
144 of sa-mRNA encoding luciferase (LUC-sa-mRNA). The LUC-sa-mRNA was again  
145 administered by intradermal electroporation. Pretreatment and posttreatment of the  
146 LUC-sa-mRNA injection site twice daily with a clobetasol ointment during 3 days  
147 prolonged the translation with one week and increased the initial translation within the  
148 first 6 days (Fig. 4a-b). This treatment regimen with clobetasol caused a 3.5–fold  
149 increase in overall translation of the LUC-sa-mRNA (Fig. 4b and Fig. S2 a). In contrast,  
150 co-injection of LUC-sa-mRNA with ODN2088 did not change the translation profile  
151 (Fig. 4c). Surprisingly, co-administration of BAY11 drastically reduced the translation  
152 of our LUC-sa-mRNA (Fig. 4d and Fig. S2 b). This was not due to the DMSO solvent,  
153 as LUC-sa-mRNA with equal amounts of PBS and DMSO was as effective as LUC-sa-  
154 mRNA with only PBS (Fig. S2 c).

#### 155 *Innate immunogenicity and translation efficacy of self-amplifying mRNA purified by* 156 *cellulose chromatography*

157 It is well-known that double-stranded (ds) RNA contaminants in synthetic (IVT)  
158 mRNAs play an important role in the activation of type I IFNs and translational  
159 inhibition [1, 18]. The classic purification strategies, like the silica-based columns  
160 which we routinely use, do not efficiently remove dsRNAs. However, recently it has  
161 been shown that these dsRNAs can be removed from short non-amplifying synthetic  
162 mRNAs by a cellulose-based purification method [18]. The applicability of this method  
163 to synthetic self-amplifying mRNAs, which are 3 to 4 times longer than non-amplifying  
164 mRNAs, is unknown. Therefore, in this section the capacity of this method to remove  
165 dsRNAs, to decrease the innate immunity and to improve the translation and  
166 vaccination efficacy of synthetic sa-mRNAs was investigated. We first demonstrated  
167 that synthetic sa-mRNAs purified with silica columns contained substantial amounts of  
168 dsRNA contaminants that can be efficiently removed by the novel cellulose-based  
169 purification method (Fig. 5a). Subsequently, the effect of cellulose-based purification  
170 on the innate immunity of the ZIKVac-sa-mRNA vaccine and the expression of LUC-  
171 sa-mRNA was studied after intradermal electroporation in IFN- $\beta$  reporter and BALB/c  
172 mice, respectively. In addition, the effect of pre- and posttreatment (twice daily for three  
173 days) of the injection site with clobetasol was also studied. As shown in Fig. 5b, we  
174 confirmed that the silica-purified ZIKVac-sa-mRNA vaccine elicits a strong type I IFN  
175 response that can be tempered by clobetasol (blue and black curves). Interestingly, a  
176 similar reduction of the type I IFN response could be obtained when the ZIKVac-sa-  
177 mRNA vaccine was purified by the cellulose-based method (green curve). Topical  
178 application of clobetasol could not further decrease the overall elicited type I IFN

179 response of the cellulose-purified ZIKVac-sa-mRNA (Fig 5c), albeit that clobetasol  
180 strongly reduced the IFN- $\beta$  expression (i.e. circa 10-fold) 5 h after administration of the  
181 cellulose-purified ZIKVac-sa-mRNA vaccine (Fig. 5b red curve and Fig. 5c). Although  
182 cellulose purification of the sa-mRNA significantly reduced the elicited type I IFN  
183 response, it only slightly improved the translation efficacy of the sa-mRNA (Fig. 5d,  
184 black and green curves). Nevertheless, co-administration of clobetasol significantly  
185 increased the translation of the silica-purified as well as cellulose-purified LUC-sa-  
186 mRNA. The highest expression was observed in the mice that received the cellulose-  
187 purified LUC-sa-mRNA together with clobetasol (Fig. 5d-e). As also observed in Fig.  
188 4a, clobetasol seems to prolong the translation of both the silica- and cellulose-purified  
189 LUC-sa-mRNA (Fig. 5d).

190 *Cellulose-purified self-amplifying mRNA vaccines elicit a stronger humoral and*  
191 *cellular immune response*

192 We finally investigated whether the novel cellulose-based purification method could  
193 improve the efficacy of our ZIKVac-sa-mRNA vaccine. It has been reported that inhaled  
194 and oral corticosteroids do not affect the efficacy of influenza vaccines [19, 20]. We  
195 were triggered by these contraindicative reports and therefore decided to also investigate  
196 the effect of clobetasol pre- and posttreatment on the efficacy of our ZIKVac-sa-mRNA  
197 vaccine. Forty-eight BALB/c mice were randomized in six groups and vaccinated by  
198 intradermal electroporation of either cellulose- or silica-purified ZIKVac-sa-mRNA  
199 with or without clobetasol. LUC-sa-mRNA was used as negative control (Figure 6a-b).

200 The interval between the vaccinations was four weeks and the dose was 1  $\mu$ g. Compared  
201 to the silica-purified vaccine, higher antibody titers and seroconversion rates were  
202 observed in mice receiving the cellulose-purified ZIKVac-sa-mRNA vaccine, both after  
203 the prime as well as after the boost vaccination (Figure 6c-d). As expected, a second  
204 vaccination further increased the antibody titers and seroconversion rates of both  
205 vaccines. In more detail, four weeks after the first boost the mean antibody titer and  
206 seroconversion rate of the mice vaccinated with the cellulose-purified ZIKVac-sa-  
207 mRNA vaccine was 122 and 75%, while these values were 40 and 37.5% in the mice  
208 that received the silica-purified ZIKVac-sa-mRNA vaccine (Fig. 6d). Topical  
209 application of clobetasol at the injection site completely abolished the efficacy of the  
210 ZIKVac-sa-mRNA vaccine (Figure 6c-d). As the humoral immune response improved  
211 after the boost vaccination, we decided to give a second boost to the mice that received  
212 the ZIKVac-sa-mRNA vaccine without co-administration of clobetasol (Group 1-3).  
213 Again, the antibody titer and seroconversion rates increased in both vaccinated groups  
214 and the mice that received the cellulose-purified sa-mRNA vaccine developed the  
215 highest antibody titers. Moreover, the seroconversion rate in this group increased to  
216 100%, while the seroconversion rate in mice immunized with silica-purified ZIKVac-  
217 sa-mRNA vaccine was only 62.5% (Figure 6e). In addition to this strong humoral  
218 response, increased ZIKV E protein-specific CD4<sup>+</sup> and CD8<sup>+</sup> T cell responses were  
219 seen after the final immunization with the cellulose-purified ZIKVac-sa-mRNA vaccine.  
220 These cellular responses were significantly higher than those obtained with LUC-sa-  
221 mRNA vaccinated mice (Figure 6f-g).

## 223 **Discussion**

224 Synthetic self-amplifying mRNAs are known for their high *in vivo* translational  
225 efficiency [21, 22]. However, *in vivo* administration of sa-mRNAs may induce a strong  
226 type I IFN response [5, 11, 23]. While this can be considered advantageous when the  
227 sa-mRNA is used for vaccination purposes [11, 24], several studies have demonstrated  
228 that triggering type I IFN production can negatively impact the intended adaptive  
229 immune response of intramuscularly and intradermally administered mRNA vaccines  
230 [9, 11, 15]. Evidently, a strong type I IFN mediated inflammatory response should also  
231 be avoided when synthetic mRNAs are considered for protein-replacement therapy,  
232 gene editing or stem cell reprogramming [25, 26]. In line with previous reports [8, 11,  
233 15], we found that intradermal electroporation of our formerly developed ZIKVac-sa-  
234 mRNA vaccine results in a very rapid upregulation of type I IFNs, with a maximal  
235 induction within 5 hours after sa-mRNA administration (Fig. 2). By-products  
236 originating from the *in vitro* transcription process like double strand (ds), uncapped or  
237 untailed RNAs species are contributing to this innate immune response [1]. There is  
238 also a concern that the intracellular amplification of sa-mRNAs, which occurs through  
239 dsRNA intermediates, may strongly trigger intracellular sensors such as RIG-I and  
240 MDA5 [27]. However, our data do not support this idea, as the peak in IFN- $\beta$  production  
241 occurs directly after the delivery of the sa-mRNA and thus not at the moment of sa-  
242 mRNA replication. Moreover, we recently reported a similar IFN- $\beta$  induction for  
243 replication-deficient and replication-competent sa-mRNAs in mice [15].

244 In an attempt to block the immediate type I IFN response elicited by our ZIKVac-sa-  
245 mRNA vaccine, we screened several commercial TLR and NF- $\kappa$ B/NLRP3 inhibitors  
246 (Fig. 1). Endosomal or cell surface associated TLRs are one type of PRRs that recognize  
247 dsRNAs, uncapped or untailed ssRNAs by-products present in synthetic sa-mRNA  
248 [28]. Co-injection of TLR7 (ODN20958) or TLR7/8/9 (ODN2088) antagonists with the  
249 ZIKVac-sa-mRNA vaccine seems to shortly block the recognition of ssRNA species  
250 (Fig. 2). This indicates that TLR7 and/or 8, which recognize single nucleosides and  
251 short ssRNAs (oligoribonucleotides), are involved in sensing our sa-mRNA vaccine [7,  
252 29]. We hypothesize that also degradation products occurring from sa-mRNAs that did  
253 not enter the cells after *in vivo* electroporation are recognized by cell surface associated  
254 TLR7/8. Co-administration of our sa-mRNA vaccine with BAY11, which blocks  
255 nuclear translocation of NF- $\kappa$ B and inhibits the NLRP3 inflammasome [30, 31], also  
256 significantly decreased the initial innate immune response. The short-lived  
257 downregulation of the type I IFN response by co-injected ODN2088, ODN20958 or  
258 BAY11 is probably due to a rapid dilution of the inhibitors from the injection site.  
259 Therefore, we tested pre- and post-treatment of the injection site with these inhibitors.  
260 However, this only slightly increased and prolonged the reduction of the innate immune  
261 response (Fig. 2). Probably, pre- and posttreatment with these inhibitors should be  
262 performed closer to the moment of injection, e.g. 15 min (instead of 5 h) before and 1  
263 h (instead of 12 h) after injection of the sa-mRNA vaccine. An interesting future  
264 approach would be the co-encapsulation of these innate immune inhibitors with sa-  
265 mRNA into e.g. lipid nanoparticles. Interestingly, no diminution of the type I IFN

266 response was observed when 12.5  $\mu$ g or even 25  $\mu$ g of a TLR3 inhibitor was co-  
267 administrated (Fig. S1). This is remarkable, since a dot blot assay clearly indicated that  
268 dsRNA species are present in the silica-purified sa-mRNA (Fig. 5a). Possibly the  
269 massive amounts of dsRNA in our silica-purified sa-mRNA completely competed out  
270 the binding of the TLR3 antagonist to the TLR3 receptors.

271 Besides the aforementioned specific inhibitors of the innate immune response, we also  
272 tested clobetasol propionate, which is a potent corticosteroid with a broad mode of  
273 action [32, 33]. Topical application of clobetasol at the injection site efficiently  
274 inhibited the type I IFN response elicited by our ZIKVac-sa-mRNA vaccine. However,  
275 it is essential that the injection spot is pretreated with clobetasol prior to sa-mRNA  
276 administration (Fig. 2 and 3). Moreover, additive effects were observed when topical  
277 clobetasol was combined with ODN2088 and/or BAY11 (Fig. 3). However, only  
278 clobetasol was able to significantly improve the *in vivo* translation efficacy of sa-mRNA  
279 (Fig. 4 and Fig. S2). A combination of pre-, co- and post-treatment of the injection site  
280 with clobetasol prolonged the expression of the luciferase encoding sa-mRNA with one  
281 week and significantly increased the overall expression (Fig. 4 and Fig. S2c).  
282 Surprisingly, ODN2088 did not improve the expression and BAY11 even decreased the  
283 *in vivo* expression of the sa-mRNA (Fig. 4 and Fig. S2a-b). This observation  
284 corresponds with the findings of Liu et al. (2017), who screened 15 different inhibitors  
285 and found that reduced IFN production was not associated with enhanced mRNA  
286 translation in cultured human foreskin fibroblast cells [34]. Similar to our results, 7 of  
287 the tested inhibitors even reduced the mRNA translation efficacy [34]. In contrast, Awe

288 et al. (2013) reported enhanced *in vitro* translation of the transcription factor OCT4  
289 from a synthetic mRNA upon BAY11 supplementation [35]. However, the enhanced  
290 OCT4 translation was not achieved when the type I IFN decoy receptor B18R was  
291 supplemented, indicating that the observed increase in translation was independent of  
292 type I interferons [35].

293 As mentioned earlier, synthetic mRNAs produced by *in vitro* transcription contain by-  
294 products such as dsRNAs and small abortive ssRNA species which are known to  
295 strongly stimulate innate immune responses in mammalian cells [1, 18]. Cellulose-  
296 purification is reported to efficiently remove small by-products like free ribonucleotides  
297 and dsRNA species larger than 30 bp [1, 18, 36]. The method has been successfully  
298 applied on non-amplifying *in vitro* transcribed mRNA [18]. Here we investigated  
299 whether cellulose-based purification [18] could also reduce the type I IFN response and  
300 increase the *in vivo* translation efficacy of sa-mRNAs by removing dsRNA by-products.  
301 Immunoblotting confirmed that cellulose-mediated purification of sa-mRNA efficiently  
302 removed dsRNA species and, compared to the standard silica-based purification, the  
303 cellulose-purified sa-mRNA elicited a much lower type I IFN response, which could be  
304 further reduced by topical clobetasol (Fig. 5). However, this beneficial effect of  
305 cellulose purification was not completely reflected in the translation efficacy, since  
306 significant increases in translation efficacy were only observed when the mice were  
307 treated with clobetasol (Fig. 5). The UTRs in our sa-mRNA are based on the RNA  
308 genome of VEEV, which possess structural elements in its 5'-UTR that can (partly) evade  
309 translational inhibition induced by a type I IFN response [37]. Therefore, this may



310 explain why strategies that reduce the type I IFN do not drastically improve the  
311 translation efficacy of our synthetic sa-mRNA. Alternatively, it is also possible that the  
312 drop in type I IFNs induced by TLR7/8 antagonists or cellulose-purification is not  
313 enough to improve the translation efficiency of the sa-mRNA. To further decrease the  
314 type I IFN response, inhibitors for other PRRs like RIG-I like receptor can be used and  
315 the cellulose-based purification can be further improved. Indeed, the dot blot (Fig. 5a)  
316 show some remaining dsRNA species. Baiersdörfer et al. reported that these are  
317 remaining dsRNAs are mainly short (<30 bp) dsRNAs [18]. Short uncapped dsRNAs  
318 are especially recognized by RIG-I [38]. Therefore, phosphatase treatment of the sa-  
319 mRNA prior to injection can also circumvent RIG-I-mediated detection of di/tri-  
320 phosphate 5' ends [39].

321 In a final experiment, we demonstrated that the cellulose-purified ZIKVac-sa-mRNA  
322 vaccine induced higher antigen specific humoral and cellular immune responses than  
323 the silica-purified ZIKVac-sa-mRNA vaccine. This confirms that the by-products after  
324 in vitro transcription exert negative effects on the efficacy of our sa-mRNA-based  
325 vaccine. These results also support our previous findings that silica-purified ZIKVac-  
326 sa-mRNA elicits stronger humoral and cellular immune responses in IFNAR1<sup>-/-</sup> mice,  
327 which show defective type I IFN signaling [15]. Clobetasol treatment of the vaccination  
328 site prevented the induction of a humoral immune response, despite of the beneficial  
329 effects of clobetasol on the IFN response and the translation of the sa-mRNA (Fig. 6).  
330 This is an important finding as it was reported that inhaled and oral corticosteroids do  
331 not affect the efficacy of influenza vaccines [19, 20]. Moreover, these data indicate that

332 corticosteroids can be used to prevent that antibodies are raised against mRNA encoded  
333 therapeutic proteins like e.g. clotting factors or erythropoietin.

334 In summary, among a handful of commercial TLR and NF- $\kappa$ B/NLRP3 inhibitors,  
335 topical application of clobetasol caused the strongest reduction of the innate immune  
336 response elicited after intradermal electroporation of our ZIKVac-sa-mRNA vaccine.

337 Combining clobetasol with a TLR7 antagonist and/or a NLRP-3/NF- $\kappa$ B inhibitor  
338 further reduced the innate immune response. Clobetasol also increased the translation  
339 of intradermally electroporated sa-mRNA. In a vaccination context, however, co-  
340 administration of clobetasol with our ZIKVac-sa-mRNA vaccine completely blocked  
341 the cellular and humoral immune response. In contrast, purification of the ZIKVac-sa-  
342 mRNA vaccine with a novel cellulose-based method tripled the antibody titers, doubled  
343 the cellular immune response and increased the seroconversion rate from 62.5% to 100%.

344 This improvement was associated with a drastic reduction of dsRNA by-products,  
345 which significantly decreased the type I interferon response elicited by the sa-mRNA  
346 vaccine and slightly improved the expression of the sa-mRNA. It is important to note  
347 that the data in this study were achieved by intradermal electroporation of the sa-mRNA  
348 vaccine and thus without the use of a carrier. In a future project we aim to determine if  
349 this novel purification method also improves the efficacy of sa-mRNAs that are  
350 delivered by lipid nanoparticles.

## 351 **Materials and Method**

### 352 *Mice*

353 Female BALB/c mice, aged 6-8 weeks, were purchased from Janvier (France).  
354 Heterozygous albino ( $\text{tyr}^{\text{c2J}}$ ) C57BL/6 IFN- $\beta$  reporter (IFN- $\beta^{+\Delta\beta\text{-luc}}$ ) mice used in this  
355 study were from the Institute for Laboratory Animal Science, Hannover Medical School  
356 (Germany) and the breed was further maintained in house. All mice were housed in  
357 individually ventilated cages and had free access to feed and water. Mice experiments  
358 were approved by the Ethics Committee of the Faculty of Veterinary Medicine, Ghent  
359 University (No. EC2019/62). During intradermal injections and bioluminescence  
360 imaging, mice were under isoflurane anesthesia (5% for induction and 2% for  
361 maintenance).

### 362 *Inhibitors*

363 TLR3 and 7 inhibitors ODN2088 and ODN20958 (Miltenyi Biotech, Belgium) were  
364 used in this study. The phosphorothioate modified ODN2088 (5'-  
365 TCCTGGCGGGGAAGT-3') is a TLR7/8/9 antagonist, while the phosphorothioate  
366 modified oligonucleotide ODN20958 is a TLR-7 inhibitor (5'-  
367 TCCTAACAAAAAAT-3'). The TLR3/dsRNA complex inhibitor ( $\text{C}_{18}\text{H}_{13}\text{ClFNO}_3\text{S}$ )  
368 was bought from Merck Millipore (Belgium). The NF- $\kappa\text{B}$  and NOD-like receptor pyrin  
369 3 (NLRP3) inhibitor BAY11-7082 was from Invivogen (Belgium). The TLR3/dsRNA  
370 complex inhibitor and BAY11-7082 were dissolved in DMSO. Clobetasol propionate

371 ointment (0.05%, Dermovate<sup>TM</sup> Cream) was from GlaxoSmithKline (GSK).

372 *mRNA and silica purification*

373 Self-amplifying mRNA (sa-mRNA) was synthesized via *in vitro* transcription (IVT) as  
374 described [15]. Briefly, ZIKVac-sa-mRNA was constructed by inserting the sequence  
375 of the Zika virus prM-E fusion protein of the Brazilian Rio-S1 ZIKV strain (GenBank  
376 No. KU926310.1) containing a signal peptide of Japanese encephalitis virus (JEV) at  
377 the 5' terminal end into the pTK155 plasmid using Gateway Cloning (Invitrogen). The  
378 sequence of firefly luciferase (LUC) was cloned into pTK155 to produce LUC-sa-  
379 mRNA. The plasmids of VEEV-based ZIKVac-sa-mRNA and LUC-sa-mRNA were  
380 transformed into competent *E. coli* bacteria (Invitrogen, Massachusetts, USA) and after  
381 24 h purified with the Plasmid Plus Midi kit (Qiagen, Germany). Subsequently,  
382 linearized plasmids were obtained using I-SceI endonuclease (NEB, Massachusetts,  
383 USA) and the sa-mRNAs were synthesized by IVT with a MEGAscript T7  
384 Transcription kit (Life Technologies, Massachusetts, USA). Next the sa-mRNA was  
385 purified with the RNeasy<sup>®</sup> Mini kit (Qiagen, Germany) and post-transcriptionally  
386 capped using a ScriptCap m7G Capping System and the 2'-O-Methyltransferase kit  
387 (Cellsript, Wisconsin, USA) to obtain cap-1. After capping, the sa-mRNA was purified  
388 again with the RNeasy<sup>®</sup> Mini kit (Qiagen, Germany). As a 40-nucleotide-long poly(A)  
389 was encoded in the linearized plasmid template, Poly(A) tailing was not required. The  
390 quantity and quality of the sa-mRNAs were determined with a Nanodrop  
391 spectrophotometer (Thermo Fisher Scientific, Massachusetts, USA) and sa-mRNAs

392 were stored at  $-80^{\circ}\text{C}$ .

### 393 *Cellulose-based purification of sa-mRNAs*

394 After IVT the mRNAs (LUC-sa-mRNA and ZIKVac-sa-mRNA) were purified by LiCl  
395 precipitation and subsequently enzymatically capped as described above. Next, the  
396 capped sa-mRNAs were again precipitated with LiCl and resuspended in HEPES-  
397 ethanol buffer (10 mM HEPES, pH7.2, 0.1 mM EDTA, 125 mM NaCl and 16% ethanol).  
398 Subsequently, an additional cellulose-based purification was performed to remove  
399 dsRNA by-products as previously described [18]. Briefly, cellulose fibers (Sigma-  
400 Aldrich, Belgium) were suspended in HEPES-ethanol buffer at a concentration of 0.2  
401 g/mL. After 10 min of vigorous mixing, 630  $\mu\text{l}$  of the cellulose suspension was  
402 transferred to a microcentrifuge spin column (NucleoSpin Filters, Macherey-Nagel,  
403 Düren, Germany) and centrifuged for 1 min at 14,000 g. The flow through was  
404 discarded and 450  $\mu\text{l}$  HEPES-ethanol buffer was added to the cellulose fibers followed  
405 by vigorously shaking for 5 min. Subsequently, the spin column was centrifuged for 1  
406 min at 14,000 g and the flow through was discarded. Hundred to 500  $\mu\text{g}$  of sa-mRNA  
407 in 450  $\mu\text{l}$  HEPES-ethanol buffer was added to the cellulose in the spin column followed  
408 by vigorously shaking for 30 min to allow association of the dsRNA by-products to the  
409 cellulose. Separation of the cellulose associated dsRNA from the sa-mRNA occurred  
410 by centrifugation at 14,000 g for 1 min. The collected flow through containing the sa-  
411 mRNA was precipitated by adding 0.1 volume of 3 M NaOAc pH 5.5 (50  $\mu\text{l}$ ) and 1  
412 volume of isopropanol and incubating this mixture for 30 min at  $-20^{\circ}\text{C}$ . Next, the

413 mRNA was pelleted by centrifugation at 4 °C for 15 min at 14,000 g and the supernatant  
414 was discarded. The pellet was washed with 500 µl 70% pre-cooled ethanol and  
415 centrifuged at 4 °C for 5 min at top speed. The supernatant was removed and the  
416 cellulose-purified mRNA was finally dissolved in nuclease-free water.

417 *Dot blot analysis of dsRNA by-products*

418 Silica- or cellulose-purified sa-mRNAs (LUC-sa-mRNA and ZIKVac-sa-mRNA) were  
419 diluted in nuclease-free water to final concentrations of 40 and 200 ng/µl. Subsequently  
420 5 µl aliquots (200 or 1000 ng sa-mRNAs per dot) were loaded to a positively charged  
421 nylon membrane (Whatman Nytran SuPerCharge, Sigma-Aldrich) that was tapped on  
422 a sheet of Whatman GB005 blotting paper. After drying, the membrane was blocked in  
423 5% (w/v) non-fat dried milk in PBS-T buffer (0.1% (v/v) Tween-20 in PBS) for 1 h at  
424 room temperature. After three washes with PBS-T buffer, the membrane was incubated  
425 overnight at 4°C on a rolling mixer with mouse J2 anti-dsRNA murine antibody  
426 (Scicons, Budapest, Hungary) diluted 1:5,000 in PBS-T buffer containing 1% (w/v)  
427 non-fat dried milk. Next, the membranes were washed three times with PBS-T buffer  
428 before and incubated for 1h at room temperature with horseradish peroxidase (HRP)-  
429 conjugated donkey anti-mouse IgG (H+L, Jackson ImmunoResearch Laboratories,  
430 Cambridgeshire, UK) diluted 1:10,000 in PBS-T buffer containing 1% (w/v) non-fat  
431 dried milk. After washing the membranes three times with PBS-T buffer, the detection  
432 of the target dsRNAs on the membrane was performed using SuperSignal West Femto  
433 Maximum Sensitivity Substrate (Thermo Scientific) and the ChemiDoc MP Imaging

434 System (Bio-Rad, USA).

435 *In vivo interferon response*

436 Interferon beta reporter (IFN- $\beta^{+\Delta\beta-luc}$ ) mice were used to investigate the effect of several  
437 innate immune inhibitors on the interferon response elicited by our ZIKVac-sa-mRNA  
438 vaccine. IFN- $\beta^{+\Delta\beta-luc}$  mice were shaved at their flanks and intradermally injected at both  
439 flanks with 0.5  $\mu$ g sa-mRNA vaccine in 25  $\mu$ l PBS (without Ca<sup>2+</sup> and Mg<sup>2+</sup>) using 29  
440 G insulin needles (VWR, Netherlands). Electroporation, when used, was performed  
441 immediately after each sa-mRNA injection with a 2-needle array electrode containing  
442 4 needles per row of 4 mm (AgilePulse, BTX Harvard Apparatus, Massachusetts, USA).  
443 The procedure of electroporation involved two short high-voltage pulses of 450 V with  
444 a duration of 0.05 ms and an interval of 300 ms followed by eight long low-voltage  
445 pulses of 100 V with a duration of 10 ms and an interval of 300 ms [4, 15]. Innate  
446 immune inhibitors (Fig. 1) were co-injected with the sa-mRNA vaccine. In certain  
447 experiments the injection site was 5 h before sa-mRNA administration also pretreated  
448 and posttreated twice daily by intradermal injection of the innate inhibitors. The  
449 corticosteroid clobetasol was not injected but topically applied as an ointment at the  
450 injection site (25  $\mu$ g clobetasol per cm<sup>2</sup>) and in certain experiments pre- and  
451 posttreatments was also evaluated. The type I IFN response was monitored by  
452 measuring daily during 7 days the bioluminescent signal at the injection sites. To that  
453 end, mice were subcutaneously injected with 200  $\mu$ l D-luciferin (15 mg/ml, Gold  
454 Biotechnology, USA). Twelve minutes later the mice were anesthetized using

455 isoflurane and the *in vivo* bioluminescence signal was recorded using an IVIS Lumina  
456 II (PerkinElmer, USA).

#### 457 *In vivo translation kinetics*

458 The effect of selected innate inhibitors and the cellulose-based purification method on  
459 the *in vivo* translation of the sa-mRNA was investigated by intradermal electroporation  
460 (see above for protocol) of 1 µg silica- or cellulose-purified LUC-sa-mRNA in BALB/c  
461 mice in the presence or absence of the indicated innate immune inhibitors. The  
462 luciferase expression was monitored during 28 or 35 days by *in vivo* optical imaging as  
463 described above.

#### 464 *Vaccination experiment*

465 Preshaved female BALB/c mice (6 weeks) were anesthetized by inhalation of isoflurane  
466 and immunized by intradermal electroporation of 0.5 µg ZIKVac-sa-mRNA vaccine or  
467 the LUC-sa-mRNA in both flanks using the vaccination schedule depicted in Fig. 6a.  
468 Silica- and cellulose-purified ZIKVac-sa-mRNA vaccines with and without treatment  
469 of the injection site with clobetasol were investigated. Topical treatment of clobetasol  
470 involved a pretreatment of the injection site 12 h prior to vaccination and a  
471 posttreatment twice daily until 3 days after immunization. Electroporation was  
472 performed immediately after each ZIKVac-sa-mRNA injection using the protocol  
473 described above.

#### 474 *Zika virus specific antibody titers*



475 The mouse ZIKV ELISA kit (Alpha Diagnostic International, TX, USA) was used to  
476 determine ZIKV E protein-specific antibody titers. In more details, 96-well plates that  
477 were pre-coated with ZIKV E protein were equilibrated for 5 min at room temperature  
478 with 300  $\mu$ l of the provided wash buffer. Subsequently, two-fold serial dilutions of the  
479 serum samples were made (starting from a 50-fold dilution) and 100  $\mu$ l of these  
480 dilutions was added per well along with the calibration standards. After 1 h of  
481 incubation at room temperature, the plates were washed four times with wash solution.  
482 Next, 100  $\mu$ l of anti-mouse IgG HRP-conjugate working solution was added to the wells  
483 and incubated at room temperature. After 30 min, the wells were washed five times and  
484 subsequently incubated with 100  $\mu$ l of 3,3',5,5'-Tetramethylbenzidine (TMB) substrate  
485 at room temperature. The enzymatic conversion of TMB was stopped after 15 min by  
486 adding 100  $\mu$ l of stop solution and the absorbance was measured at 450 nm in a  
487 Biochrom EZ 400 microplate reader (Biochrom, England). The antibody endpoint titers  
488 were defined as the highest reciprocal dilution with an absorbance that was at least two  
489 times the background (obtained with serum of unvaccinated mice).

#### 490 *Zika Virus specific cellular immune response*

491 Intracellular cytokine staining was performed to determine Zika virus specific CD4<sup>+</sup>  
492 and CD8<sup>+</sup> T cells responses with flow cytometry. In more detail, splenocytes were  
493 isolated one week after the last boost and stimulated in 96-well plates ( $1 \times 10^6$  cells/well)  
494 with 2  $\mu$ g/ml of overlapping 15-amino-acid peptides covering the ZIKV E protein (JPT,  
495 Berlin, Germany) in 1640 RPMI medium. After 1 h of stimulation at 37 °C 0.3  $\mu$ l of

496 eBioscience™ protein transport inhibitor cocktail (Brefeldin A 5.3 mM + Monensin 1  
497 mM, eBioscience) was added to 150 µl of stimulated splenocytes and the samples were  
498 further incubated for 5 h at 37 °C. Splenocytes were then harvested, washed with cold  
499 PBS, treated with mouse BD Fc Block™ (BD Biosciences), and stained with anti-CD3-  
500 APC/CD4-PerCP/CD8-Alexa Fluor 488 antibodies (clones 145-2C11, RM4-5 and 53-  
501 6.7, Biolegend) for 30 min at 4 °C according to the manufacturer's instructions.  
502 Subsequently, the cells were fixed and permeabilized with the  
503 Fixation/Permeabilization buffer (eBioscience) for 30 min at 4 °C before intracellular  
504 staining with anti-IFN-γ-PE antibody (clone XMG1.2, Biolegend) for 30 min at room  
505 temperature. All the samples were finally washed and stored at 4 °C until analysis using  
506 a Cytoflex flow cytometer (Beckman Coulter). Single and live cells were gated and  
507 300,000 events were collected for each sample. Samples treated with Cell Stimulation  
508 Cocktail (eBioscience) served as positive controls and unstimulated samples as  
509 negative controls.

#### 510 *Statistical analyses*

511 Statistical analyses were performed with GraphPad Prism software (version 7.0,  
512 GraphPad Software Inc., CA, USA). The longitudinal experiments of different animal  
513 groups were analyzed using repeated-measures two-way ANOVA, corrected for  
514 multiple comparisons (Bonferroni method). Differences between two groups were  
515 compared with student's t test (non-parametric Mann-Whitney U test). Data in the study  
516 are represented as means ± SEM, unless otherwise mentioned. A p-value of below 0.05

517 is considered statistically significant difference (\* $p < 0.05$ , \*\* $p < 0.01$ , \*\*\* $p < 0.001$ ,  
518 \*\*\*\* $p < 0.0001$ ).

### 519 **Acknowledgements**

520 This work was supported by the concerted research action (GOA) found of Ghent University  
521 (project code BOF15/GOA/013) and the research foundation-Flanders (FWO, project code  
522 G087516N). Z.Z. acknowledges the funding from China Scholarship Council (CSC)  
523 (201607650018).

524

### 525 **Author Contributions**

526 Z.Z. and N.N.S. conceived experiments, participated in experimental studies, interpreted the  
527 results and wrote the manuscript. S.M.C and L.O. assisted to perform cellulose-based  
528 purification of sa-mRNA. F.C. and N.N.S. critically revised the manuscript. S.M.C, H.W, H.H,  
529 J.D.T and J.P.P.C helped with the *in vivo* experiments. S.L. provided IFN- $\beta^{+/\Delta\beta-luc}$  reporter mice.  
530 All authors have given approval to the final version of the manuscript.

531

### 532 **Conflicts of Interest**

533 The authors declare no competing interests.

534

## 535 References

- 536 1. Zhong, Z., et al., *mRNA therapeutics deliver a hopeful message*. Nano Today, 2018. **23**: p. 16-  
537 39.
- 538 2. Pardi, N., et al., *mRNA vaccines - a new era in vaccinology*. Nat Rev Drug Discov, 2018. **17**(4): p.  
539 261-279.
- 540 3. Andries, O., et al., *Comparison of the gene transfer efficiency of mRNA/GL67 and pDNA/GL67*  
541 *complexes in respiratory cells*. Mol Pharm, 2012. **9**(8): p. 2136-45.
- 542 4. Huysmans, H., et al., *Expression Kinetics and Innate Immune Response after Electroporation*  
543 *and LNP-Mediated Delivery of a Self-Amplifying mRNA in the Skin*. Mol Ther Nucleic Acids, 2019.  
544 **17**: p. 867-878.
- 545 5. Leyman, B., et al., *Comparison of the Expression Kinetics and Immunostimulatory Activity of*  
546 *Replicating mRNA, Nonreplicating mRNA, and pDNA after Intradermal Electroporation in Pigs*.  
547 Mol Pharm, 2018.
- 548 6. Andries, O., et al., *Innate immune response and programmed cell death following carrier-*  
549 *mediated delivery of unmodified mRNA to respiratory cells*. J Control Release, 2013. **167**(2): p.  
550 157-66.
- 551 7. Devoldere, J., et al., *Evading innate immunity in nonviral mRNA delivery: don't shoot the*  
552 *messenger*. Drug Discov Today, 2016. **21**(1): p. 11-25.
- 553 8. Edwards, D.K., et al., *Adjuvant effects of a sequence-engineered mRNA vaccine: translational*  
554 *profiling demonstrates similar human and murine innate response*. J Transl Med, 2017. **15**(1):  
555 p. 1.
- 556 9. De Beuckelaer, A., et al., *Type I Interferons Interfere with the Capacity of mRNA Lipoplex*  
557 *Vaccines to Elicit Cytolytic T Cell Responses*. Mol Ther, 2016. **24**(11): p. 2012-2020.
- 558 10. Pollard, C., et al., *Type I IFN counteracts the induction of antigen-specific immune responses by*  
559 *lipid-based delivery of mRNA vaccines*. Mol Ther, 2013. **21**(1): p. 251-9.
- 560 11. Pepini, T., et al., *Induction of an IFN-Mediated Antiviral Response by a Self-Amplifying RNA*  
561 *Vaccine: Implications for Vaccine Design*. J Immunol, 2017. **198**(10): p. 4012-4024.
- 562 12. Kariko, K., et al., *Suppression of RNA recognition by Toll-like receptors: the impact of nucleoside*  
563 *modification and the evolutionary origin of RNA*. Immunity, 2005. **23**(2): p. 165-75.
- 564 13. Weissman, D., et al., *HPLC purification of in vitro transcribed long RNA*. Methods Mol Biol, 2013.  
565 **969**: p. 43-54.
- 566 14. Kariko, K., et al., *Generating the optimal mRNA for therapy: HPLC purification eliminates*  
567 *immune activation and improves translation of nucleoside-modified, protein-encoding mRNA*.  
568 Nucleic Acids Res, 2011. **39**(21): p. e142.
- 569 15. Zhong, Z., et al., *Immunogenicity and Protection Efficacy of a Naked Self-Replicating mRNA-*  
570 *Based Zika Virus Vaccine*. Vaccines, 2019. **7**(3): p. 96.
- 571 16. Kauffman, K.J., et al., *Efficacy and immunogenicity of unmodified and pseudouridine-modified*  
572 *mRNA delivered systemically with lipid nanoparticles in vivo*. Biomaterials, 2016. **109**: p. 78-87.
- 573 17. Lienenklaus, S., et al., *Novel reporter mouse reveals constitutive and inflammatory expression*  
574 *of IFN-beta in vivo*. J Immunol, 2009. **183**(5): p. 3229-36.
- 575 18. Baiersdorfer, M., et al., *A Facile Method for the Removal of dsRNA Contaminant from In Vitro-*  
576 *Transcribed mRNA*. Mol Ther Nucleic Acids, 2019. **15**: p. 26-35.

- 577 19. Inoue, S., et al., *Influence of corticosteroid therapy on the serum antibody response to influenza*  
578 *vaccine in elderly patients with chronic pulmonary diseases*. EXCLI J, 2013. **12**: p. 760-5.
- 579 20. Kubiet, M.A., et al., *Serum antibody response to influenza vaccine in pulmonary patients*  
580 *receiving corticosteroids*. Chest, 1996. **110**(2): p. 367-70.
- 581 21. Vogel, A.B., et al., *Self-Amplifying RNA Vaccines Give Equivalent Protection against Influenza to*  
582 *mRNA Vaccines but at Much Lower Doses*. Mol Ther, 2017.
- 583 22. Geall, A.J., et al., *Nonviral delivery of self-amplifying RNA vaccines*. Proc Natl Acad Sci U S A,  
584 2012. **109**(36): p. 14604-9.
- 585 23. Huysmans, H., et al., *Expression kinetics and innate immune response after electroporation and*  
586 *lipid nanoparticle-mediated delivery of a self-amplifying mRNA in the skin of mice*. Molecular  
587 Therapy - Nucleic Acids, 2019.
- 588 24. Nguyen, D.N., et al., *Lipid-derived nanoparticles for immunostimulatory RNA adjuvant delivery*.  
589 Proc Natl Acad Sci U S A, 2012. **109**(14): p. E797-803.
- 590 25. Pardi, N., et al., *Expression kinetics of nucleoside-modified mRNA delivered in lipid*  
591 *nanoparticles to mice by various routes*. J Control Release, 2015. **217**: p. 345-51.
- 592 26. Theofilopoulos, A.N., et al., *Type I interferons (alpha/beta) in immunity and autoimmunity*.  
593 Annu Rev Immunol, 2005. **23**: p. 307-36.
- 594 27. Brisse, M. and H. Ly, *Comparative Structure and Function Analysis of the RIG-I-Like Receptors:*  
595 *RIG-I and MDA5*. Front Immunol, 2019. **10**: p. 1586.
- 596 28. Moresco, E.M., D. LaVine, and B. Beutler, *Toll-like receptors*. Curr Biol, 2011. **21**(13): p. R488-  
597 93.
- 598 29. Desmet, C.J. and K.J. Ishii, *Nucleic acid sensing at the interface between innate and adaptive*  
599 *immunity in vaccination*. Nat Rev Immunol, 2012. **12**(7): p. 479-91.
- 600 30. Zhao, J., et al., *Bay11-7082 attenuates murine lupus nephritis via inhibiting NLRP3*  
601 *inflammasome and NF-kappaB activation*. Int Immunopharmacol, 2013. **17**(1): p. 116-22.
- 602 31. Hu, S., et al., *The pharmacological NF-kappaB inhibitor BAY11-7082 induces cell apoptosis and*  
603 *inhibits the migration of human uveal melanoma cells*. Int J Mol Sci, 2012. **13**(12): p. 15653-67.
- 604 32. Jacobson, C., R.C. Cornell, and R.C. Savin, *A comparison of clobetasol propionate 0.05 percent*  
605 *ointment and an optimized betamethasone dipropionate 0.05 percent ointment in the*  
606 *treatment of psoriasis*. Cutis, 1986. **37**(3): p. 213-4, 216, 218-20.
- 607 33. Allenby, C.F., et al., *Effect on adrenal function of topically applied clobetasol propionate*  
608 *(Dermovate)*. Br Med J, 1975. **4**(5997): p. 619-21.
- 609 34. Liu, Y., M.N. Krishnan, and K.K.L. Phua, *Suppression of mRNA Nanoparticle Transfection in*  
610 *Human Fibroblasts by Selected Interferon Inhibiting Small Molecule Compounds*. Biomolecules,  
611 2017. **7**(3).
- 612 35. Awe, J.P., et al., *BAY11 enhances OCT4 synthetic mRNA expression in adult human skin cells*.  
613 Stem Cell Res Ther, 2013. **4**(1): p. 15.
- 614 36. Pascolo, S., *Messenger RNA-based vaccines*. Expert Opin Biol Ther, 2004. **4**(8): p. 1285-94.
- 615 37. Hyde, J.L., et al., *A viral RNA structural element alters host recognition of nonself RNA*. Science,  
616 2014. **343**(6172): p. 783-7.
- 617 38. Hornung, V., et al., *5'-Triphosphate RNA is the ligand for RIG-I*. Science, 2006. **314**(5801): p.  
618 994-7.
- 619 39. Schott, J.W., et al., *Viral and Synthetic RNA Vector Technologies and Applications*. Mol Ther,  
620 2016. **24**(9): p. 1513-27.

621 **Figures legends**

622 **Fig. 1. Structure of the innate inhibitors used in this study.** Oligonucleotides  
623 ODN2088 and ODN20958 respectively inhibit TLR7/8/9 and TLR7 (a). Chemical  
624 structure of the TLR3/dsRNA complex inhibitor (termed “TLR3 inhibitor” in this paper)  
625 (b). Clobetasol propionate is a topically applied corticosteroid with broad  
626 immunosuppressive properties including NF- $\kappa$ B inhibition (c). BAY11 inhibits the  
627 intracellular NLRP3 receptor and NF- $\kappa$ B activation (d).

628

629 **Fig. 2. Effect of innate immune inhibitors on the kinetics of the type I IFN response**  
630 **after intradermal electroporation of a sa-mRNA vaccine against Zika virus in IFN-**  
631  **$\beta^{+/\Delta\beta}$ -luc reporter mice.** Y-axis values represent the type I IFN response after a single  
632 intradermal electroporation of the ZIKVac-sa-mRNA vaccine (1  $\mu$ g in 50  $\mu$ l) or PBS  
633 control (a) and the capacity of inhibitors ODN2088 (b, f), ODN20958 (c), BAY11 (e,  
634 g) and clobetasol (h) to temper the innate immunogenicity over 1 week. Inhibitors  
635 ODN2088, ODN20958, BAY11 were mixed with the ZIKVac-sa-mRNA vaccine  
636 before administration. Since DMSO is needed to dissolve BAY11, the influence of  
637 DMSO was also studied (d). Panels (f) and (g) depict the effect of repeated ODN2088  
638 or BAY11 administration where the injection site was first intradermally injected with  
639 the inhibitors 5 hours prior to ZIKVac-sa-mRNA administration, followed by a second  
640 inhibitor treatment 7 hours later. Local injection of the inhibitors continued twice daily  
641 until day 5. In contrast to the other inhibitors, clobetasol propionate was topically  
642 applied (25  $\mu$ g in 1 cm<sup>2</sup>) one day prior to ZIKVac-sa-mRNA administration and  
643 repeated twice daily until day 3. Each symbol represents the mean of four individual  
644 mice and the error bars represent SEM.

645

646 **Fig. 3. Effect of topical clobetasol in combination with other inhibitors on the type**  
647 **I IFN response kinetics after intradermal electroporation of ZIKVac-sa-mRNA in**  
648 **IFN- $\beta^{+/\Delta\beta}$ -luc reporter mice.** Treatment schedule of the injection site (a). ZIKVac-sa-

649 mRNA vaccine (1  $\mu$ g in 50  $\mu$ l) administration was directly followed by topical  
650 application of clobetasol propionate (25  $\mu$ g in 1 cm<sup>2</sup>) twice per day and continued over  
651 3 days (b). Additionally, clobetasol was combined with 25  $\mu$ g BAY11 (c), 20  $\mu$ g  
652 ODN2088 (d), or ODN2088 and BAY11 together (e). These inhibitors were co-injected  
653 once with the ZIKVac-sa-mRNA. The area under the curves (AUCs) of graphs b-e are  
654 presented in f-i, respectively. Each symbol or bar represents the mean of four individual  
655 mice and the error bars represent SEM.

656

657 **Fig. 4. Influence of innate immune inhibitors on the translation of sa-mRNA**  
658 **encoding luciferase in BALB/c mice.** Time schedule of the animal experiment (a).  
659 Wild type BALB/c mice were intradermally electroporated with 1  $\mu$ g of sa-mRNA  
660 encoding luciferase (LUC-sa-mRNA) in the presence of clobetasol (b), ODN2088 (c)  
661 or BAY11 (d). Topical treatment of the injection site with clobetasol (25  $\mu$ g in 1 cm<sup>2</sup>)  
662 was performed 1 day prior to LUC-sa-mRNA injection and subsequently twice daily  
663 for three days. BAY11 (25  $\mu$ g) and ODN2088 (20  $\mu$ g) were co-injected with the LUC-  
664 sa-mRNA (1  $\mu$ g in 50  $\mu$ l). The luciferase expression was determined by measuring the  
665 bioluminescent signal at the injection spot for 28 or 35 days. Each symbol represents  
666 the median of four individual mice and the error bars indicate interquartile range.

667

668 **Fig. 5. The effect of cellulose purification and clobetasol on the type I IFN response**  
669 **and translation of sa-mRNAs.** dsRNA by-products in silica- and cellulose-purified sa-  
670 mRNAs (1000 or 200 ng  $\mu$ g per dot) as analyzed by dot blotting with J2 dsRNA-specific  
671 mAb (a). Type I IFN response kinetics after intradermal electroporation of silica- and  
672 cellulose-purified ZIKVac-sa-mRNA (1  $\mu$ g) in IFN- $\beta$ <sup>+/ $\Delta$  $\beta$ -luc</sup> reporter mice with or  
673 without topical clobetasol treatment of the injection site (b). The AUC of the curves in  
674 (b) are shown in (c) (n = 4). Luciferase expression kinetics after intradermal  
675 electroporation of LUC-sa-mRNA in wild type BALB/c mice after silica- or cellulose-

676 based purification with or without clobetasol treatment of the injection site (d). The  
677 AUC of the curves in (d) are shown in (e). Each symbol or bar represents the mean of  
678 four individual mice and the error bars represent SEM. The statistical analysis of the  
679 data shown in (b) and (d) can be found in Table S1.

680

681 **Fig. 6. Vaccination efficacy of silica- and cellulose-purified ZIKVac-sa-mRNA in**  
682 **BALB/c mice topically treated with or without clobetasol.** Experimental setup (a)  
683 and overview of the different groups (b). Mice were intradermally electroporated with  
684 1 µg of cellulose- or silica-purified ZIKVac-sa-mRNA vaccine or LUC-sa-mRNA  
685 control on day 0, day 28, day 56 and day 84 (groups 1-3, without clobetasol treatment)  
686 or on day 0 and day 28 (groups 4-6, with clobetasol treatment). Antibody titers in mice  
687 were determined with a ZIKV E-protein-specific IgG ELISA at 4 weeks (c), 8 weeks  
688 (d) or 12 weeks (e) after initial immunization (n = 8). The dashed lines indicate the limit  
689 of detection of the assay. The percentage of seroconverted mice is depicted with a red  
690 line (right Y-axis). Antigen-specific CD4<sup>+</sup> (f) and CD8<sup>+</sup> (g) T cell responses in mice  
691 from groups 1-3 were assessed one week after 3<sup>rd</sup> boost by IFN-γ staining in T cells  
692 stimulated with a ZIKV E protein peptide pool (E pep +). Each bar represents the mean  
693 of eight individual mice and the error bars represent SEM.

694 **Fig. S1. Effect of the TLR3 inhibitor and lower doses of ODN2088, ODN20958 and**  
695 **BAY11 on the type I IFN response after intradermal electroporation of ZIKVac-**  
696 **sa-mRNA in IFN-β<sup>+/-</sup>Δβ-luc reporter mice.** The effects of 5 µg ODN2088 (a), 5 µg  
697 ODN20958 (b), 12.5 µg BAY11 (c), 12.5 µg and 25 µg TLR3 inhibitor (d-e) on the type  
698 I IFN response of intradermally electroporated ZIKVac-sa-mRNA (1 µg). These  
699 inhibitors were mixed with the ZIKVac-sa-mRNA upon administration. (n = 4, data are  
700 shown as means ± SEM). In addition, the area under the curves (AUC) of Fig. 2h is  
701 presented in (f).

702



703 **Fig. S2. The influence of innate immune inhibitors on the translation of LUC-sa-**  
704 **mRNA in BALB/c mice.** The area under the curves (AUCs) of Fig. 4b and 4d are  
705 presented in (a) and (b), respectively. Each bar represents the mean of four individual  
706 mice and the error bars represent SEM. The luciferase expression was determined in  
707 BALB/c mice that were intradermally electroporated with 1  $\mu$ g of LUC-sa-mRNA with  
708 DMSO or PBS, each symbol represents the median of four individual mice and the error  
709 bars represent interquartile range (c).

710

711

712

**Figure 1**

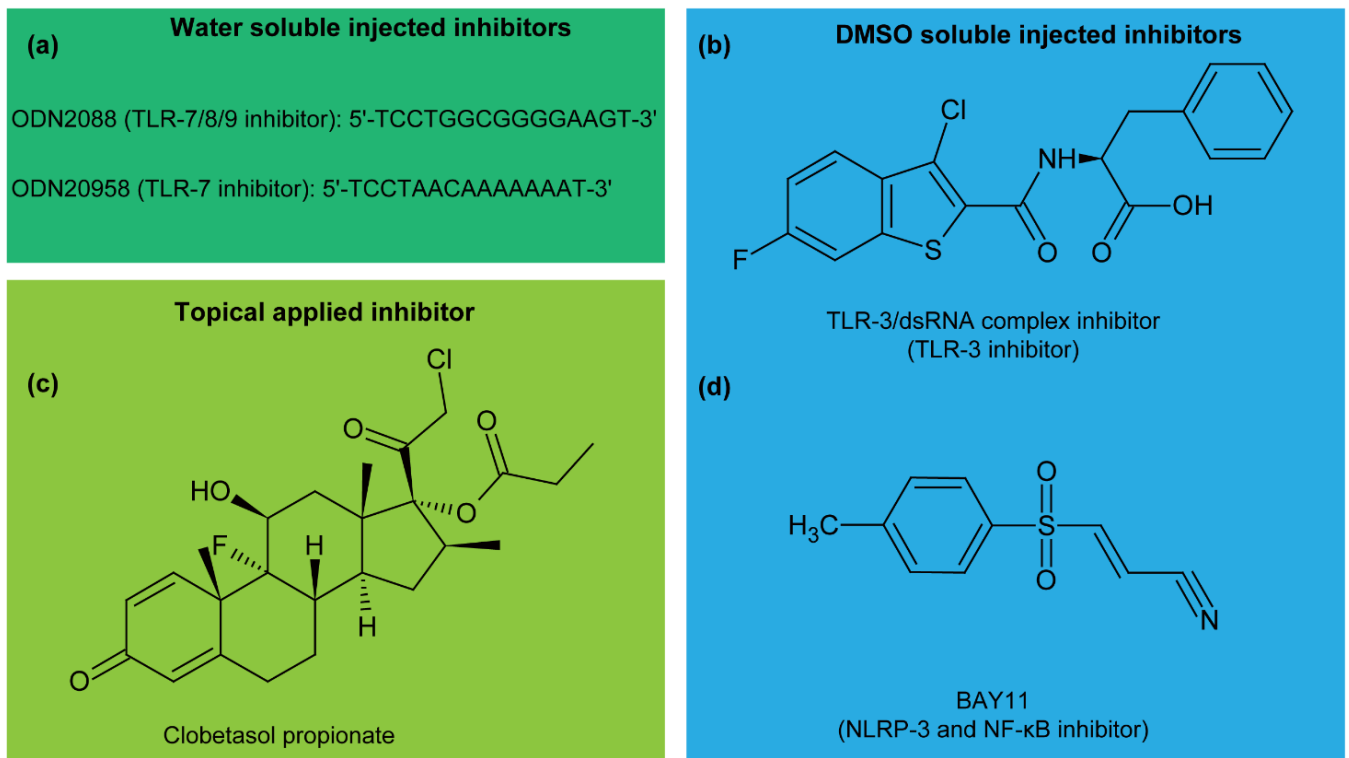

713

714

715

716

717

Figure 2

718

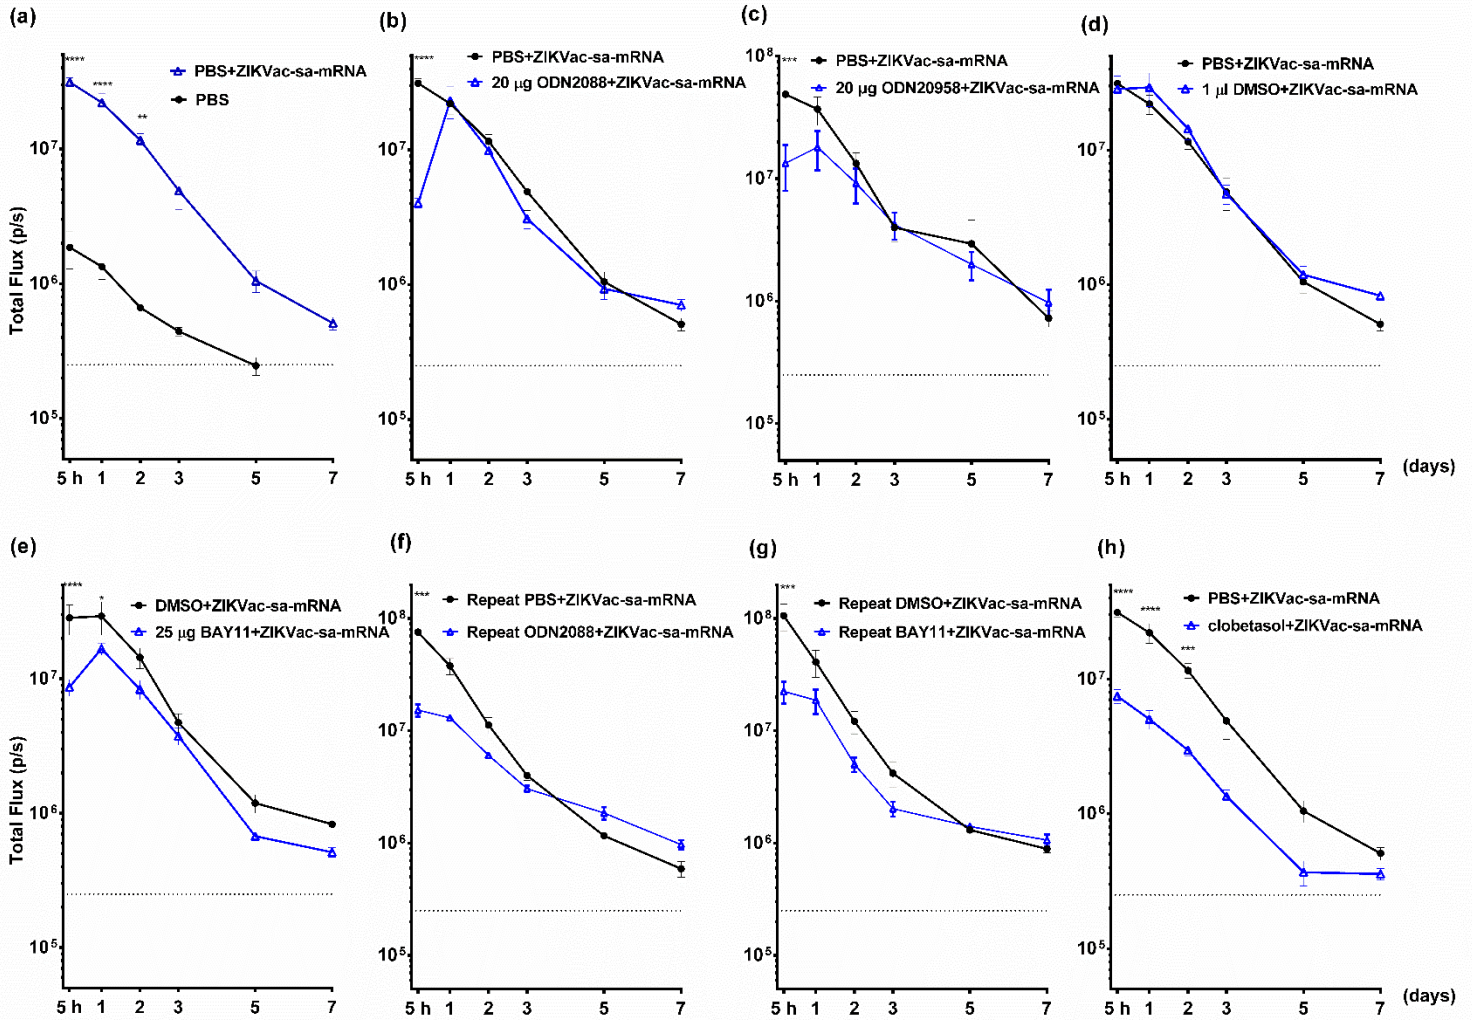

719

720

721

Figure 3

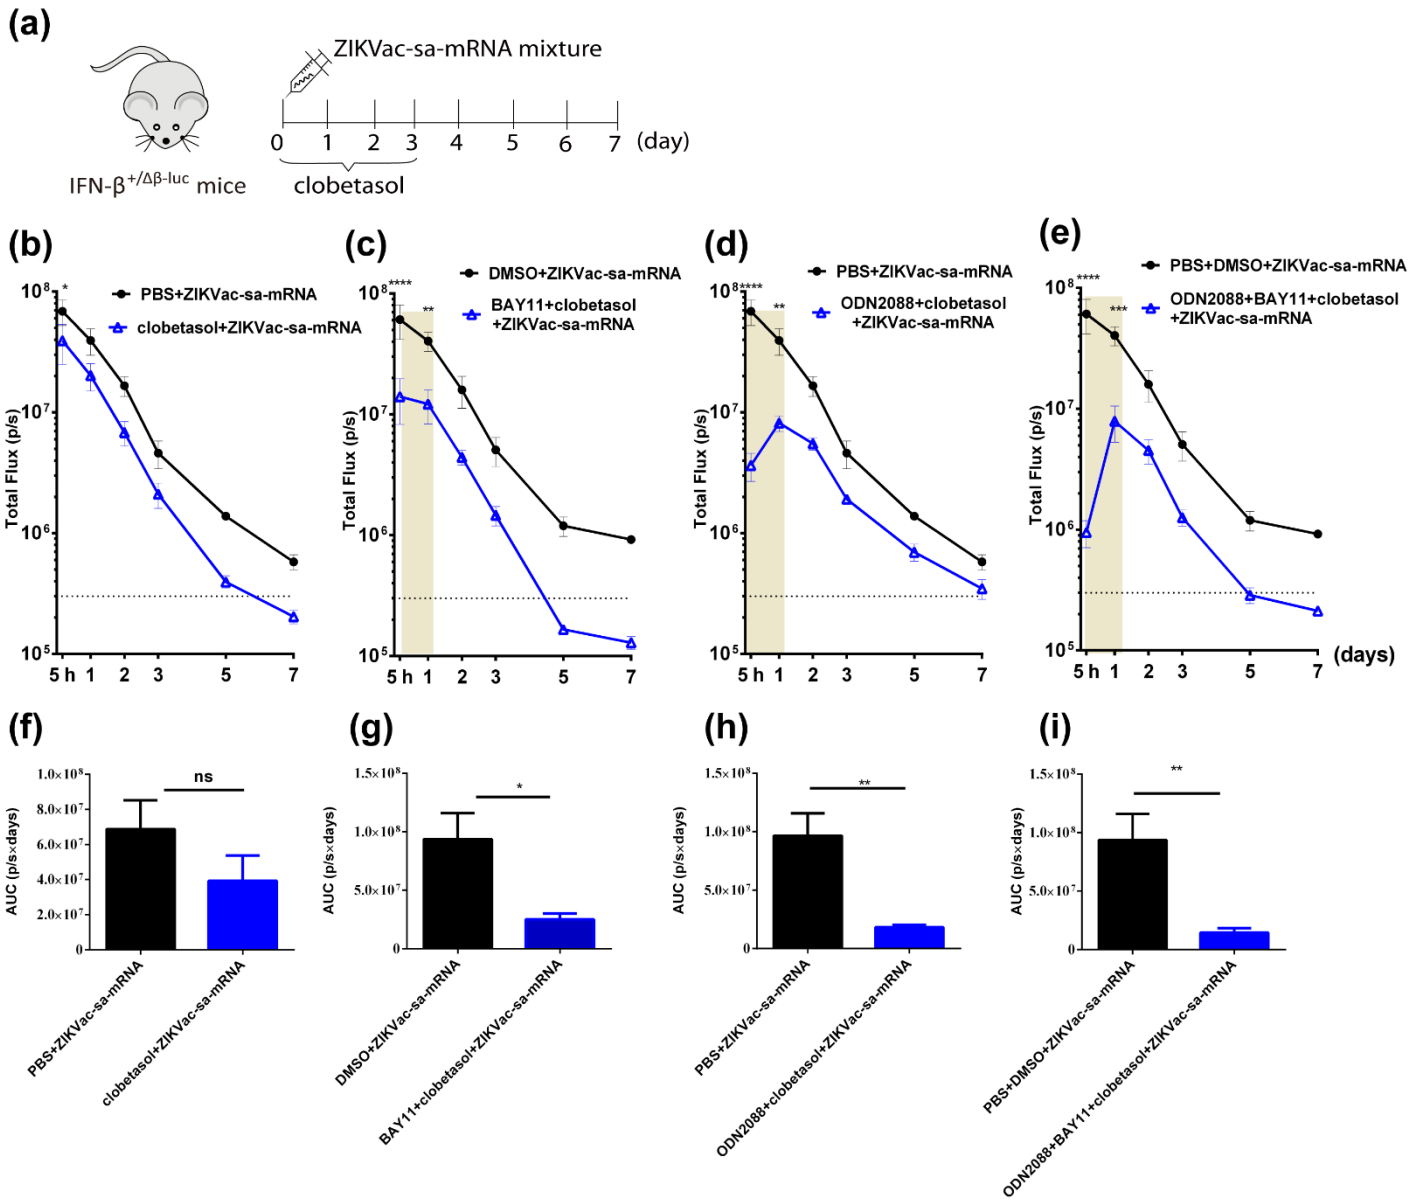

722

723

Figure 4

724

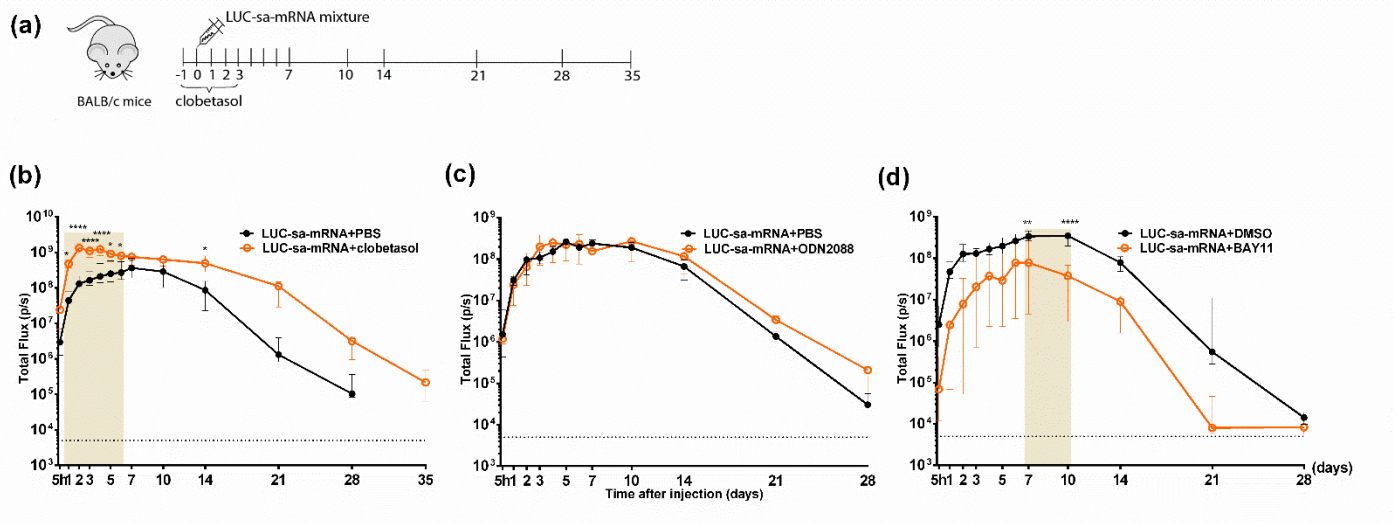

725

Figure 5

726

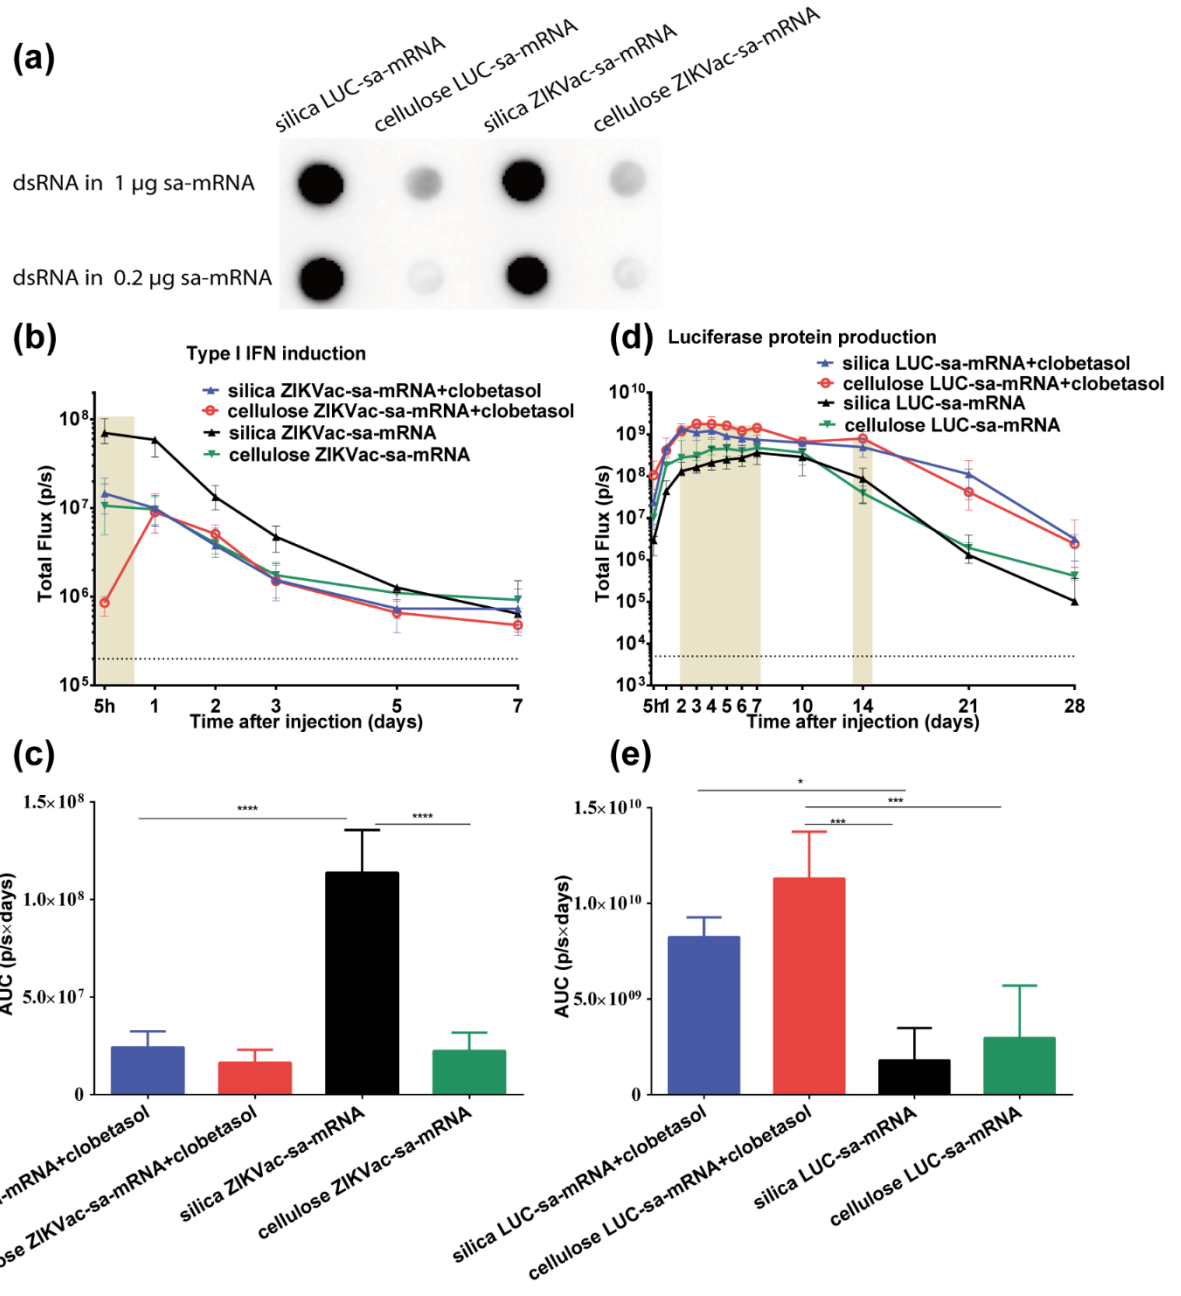

727

728

729

730

731

732

733

Figure 6

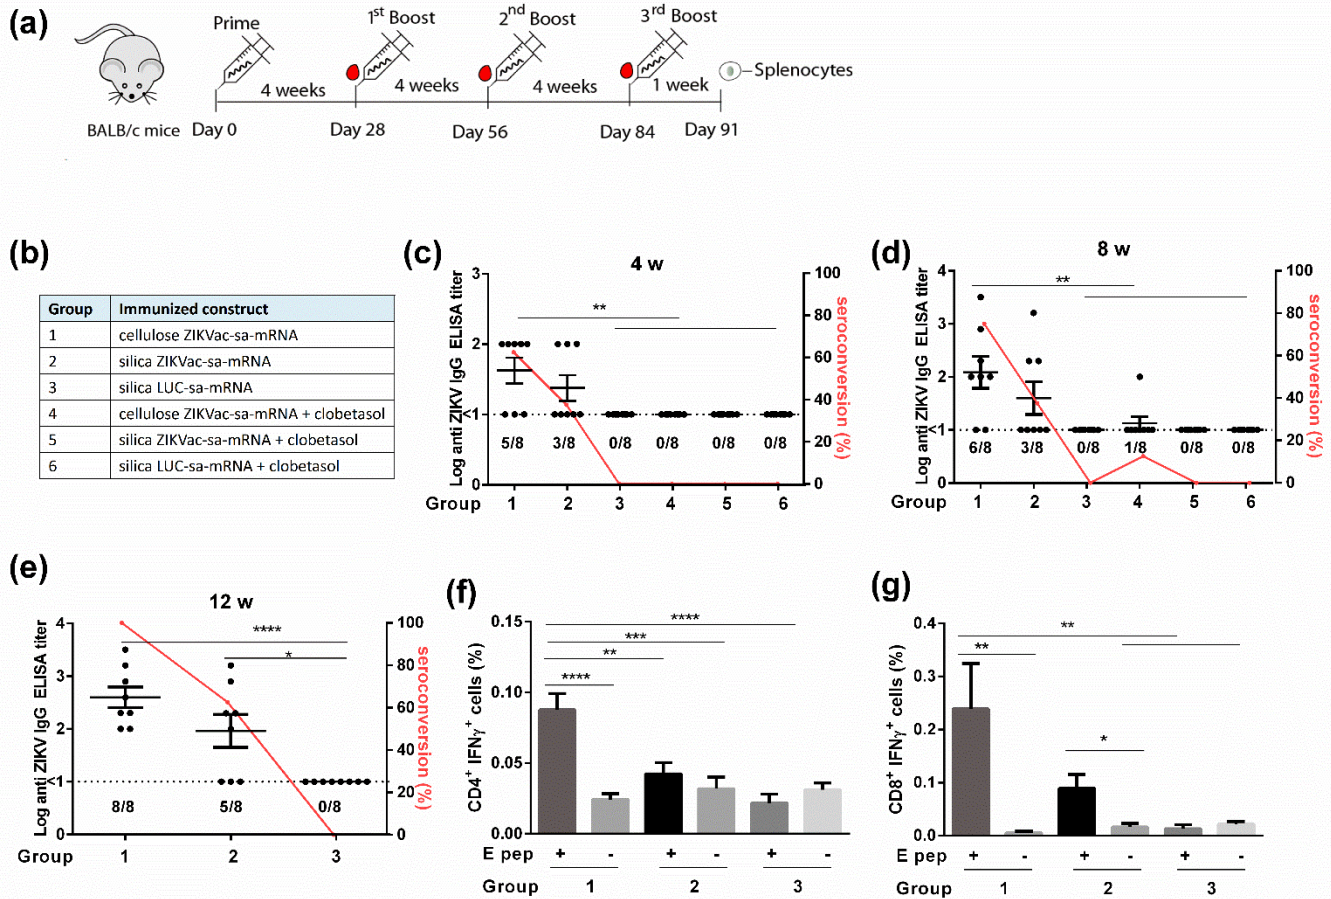

734

735

736

Figure S1

737

738

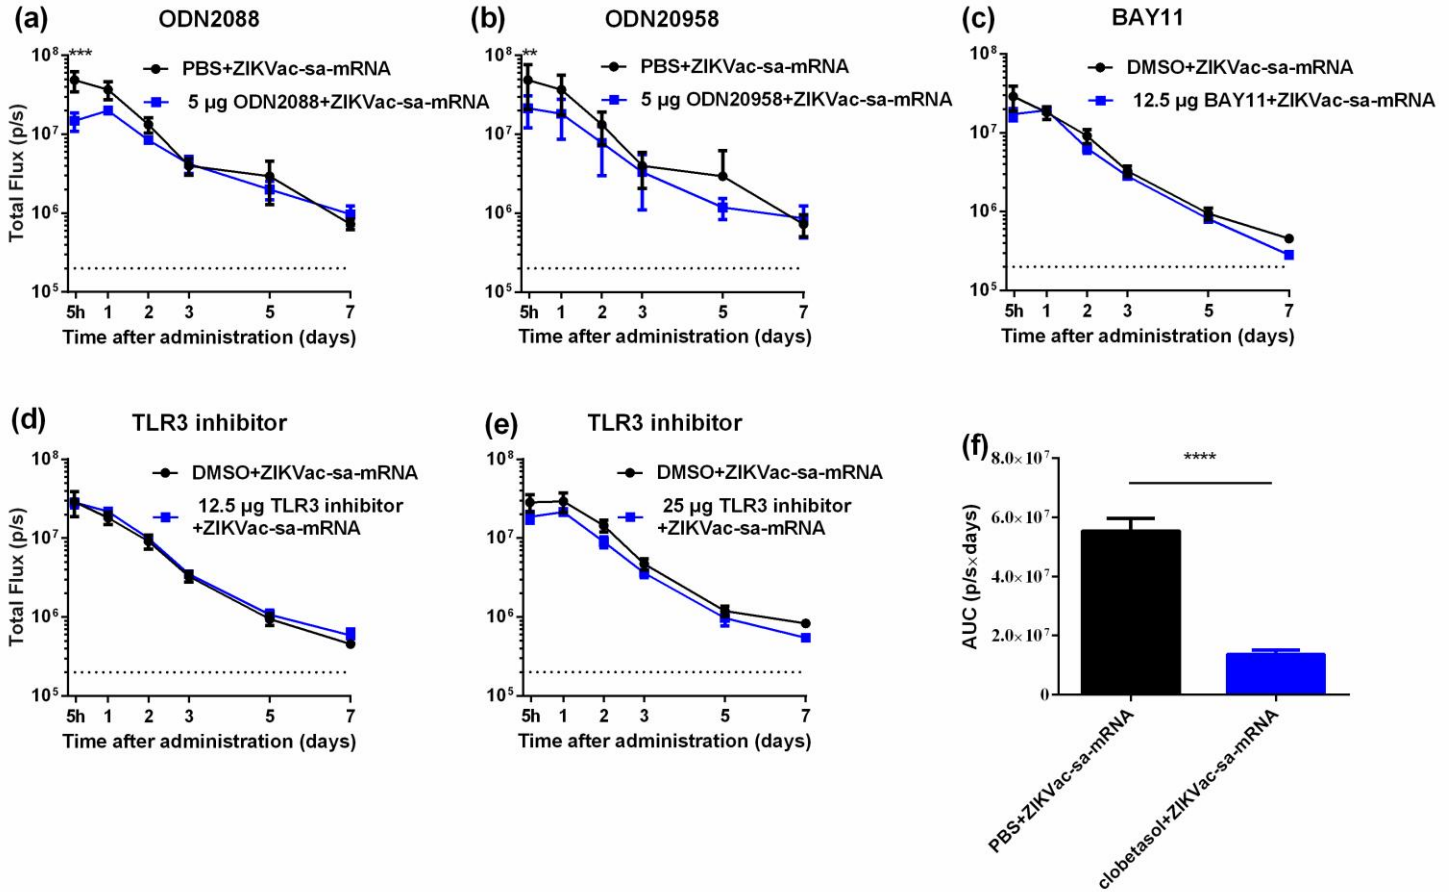

739

740

741

742



743

Figure S2

744

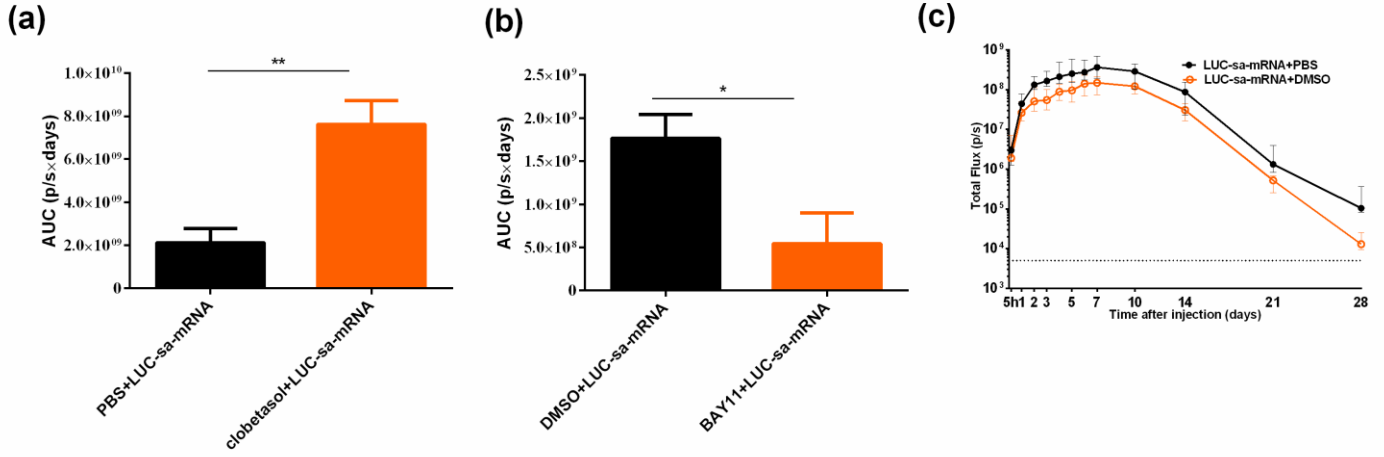

745

746

747

748

749

750

751

752

753

754

755

756

757
